# Supplementary material for: Cytoplasmic Sulfurtransferases in the Purple Sulfur Bacterium Allochromatium vinosum: Evidence for Sulfur Transfer from DsrEFH to DsrC
Source: PubMed Central journal article supplement (PMC3397948; doi:10.1371/journal.pone.0040785), 2012-07-16
Supplement: pone.0040785.s002.pdf [file pone.0040785.s002.pdf]

**Table S 1. Bacterial strains and plasmids used in this study.**

| Strains and plasmids                         | Genotype and Phenotype                                                                                                                                                                              | References or source |
|----------------------------------------------|-----------------------------------------------------------------------------------------------------------------------------------------------------------------------------------------------------|----------------------|
| <b>Strains</b>                               |                                                                                                                                                                                                     |                      |
| <i>Escherichia coli</i>                      |                                                                                                                                                                                                     |                      |
| DH5 $\alpha$                                 | F <sup>-</sup> $\phi$ 80d/lacZ $\Delta$ M15 $\Delta$ (lacZYA-argF)U169 recA1 endA1 hsdR17 (r <sub>K</sub> <sup>-</sup> m <sub>K</sub> <sup>+</sup> ) supE44 $\lambda$ <sup>-</sup> thi-1 gyrA relA1 | [1]                  |
| BL21(DE3)                                    | F <sup>-</sup> ompT gal dcm lon hsdS <sub>B</sub> (r <sub>B</sub> <sup>-</sup> m <sub>B</sub> <sup>-</sup> ) $\lambda$ (DE3 [lacI lacUV5-T7 gene 1 ind1 sam7 nin5])                                 | Novagen              |
| S17-1                                        | 294 (recA pro res mod <sup>r</sup> ) TprSmr (pRP4-2-Tc::Mu-Km::Tn7)                                                                                                                                 | [2]                  |
| <i>Allochromatium vinosum</i>                |                                                                                                                                                                                                     |                      |
| Rif50                                        | Rif <sup>r</sup> , spontaneous rifampin-resistant mutant of <i>A. vinosum</i> DSMZ 180 <sup>T</sup>                                                                                                 | [3]                  |
| $\Delta$ dsrE                                | Rif <sup>r</sup> , Rif50 with <i>in-frame</i> deletion of dsrE                                                                                                                                      | [4]                  |
| $\Delta$ dsrE + dsrE78FH                     | Rif <sup>r</sup> , Kan <sup>r</sup> , deletion mutant $\Delta$ dsrE carrying the plasmid pBBR1MCS2dsrE <sub>78</sub> FH                                                                             | this work            |
| $\Delta$ dsrE + dsrEFH20                     | Rif <sup>r</sup> , Kan <sup>r</sup> , deletion mutant $\Delta$ dsrE carrying the plasmid pBBR1MCS2dsrEFH <sub>20</sub>                                                                              | this work            |
| $\Delta$ dsrE + dsrE78FH20                   | Rif <sup>r</sup> , Kan <sup>r</sup> , deletion mutant $\Delta$ dsrE carrying the plasmid pBBR1MCS2dsrE <sub>78</sub> FH <sub>20</sub>                                                               | this work            |
| <b>Plasmids</b>                              |                                                                                                                                                                                                     |                      |
| pETEFH                                       | Ap <sup>r</sup> , T7 promotor, His-Tag, NdeI/BamHI fragment of amplified dsrEFH                                                                                                                     | [5]                  |
| pETE <sub>78</sub> FH                        | Ap <sup>r</sup> , T7 promotor, His-Tag, NdeI/BamHI fragment of amplified dsrE <sub>78</sub> FH                                                                                                      | [4]                  |
| pETEFH <sub>20</sub>                         | Ap <sup>r</sup> , T7 promotor, His-Tag, NdeI/BamHI fragment of amplified dsrEFH <sub>20</sub>                                                                                                       | [4]                  |
| pETE <sub>78</sub> FH <sub>20</sub>          | Ap <sup>r</sup> , T7 promotor, His-Tag, NdeI/BamHI fragment of amplified dsrE <sub>78</sub> FH <sub>20</sub>                                                                                        | [4]                  |
| pETCEX                                       | Ap <sup>r</sup> , T7 promotor, His-Tag, NdeI/BamHI fragment of amplified dsrC                                                                                                                       | [6]                  |
| pETCEXSer100                                 | Ap <sup>r</sup> , T7 promotor, His-Tag, NdeI/BamHI fragment of amplified dsrC <sub>100</sub>                                                                                                        | [6]                  |
| pETCEXSer111                                 | Ap <sup>r</sup> , T7 promotor, His-Tag, NdeI/BamHI fragment of amplified dsrC <sub>111</sub>                                                                                                        | [6]                  |
| pETCEXSer100/111                             | Ap <sup>r</sup> , T7 promotor, His-Tag, NdeI/BamHI fragment of amplified dsrC <sub>100/111</sub>                                                                                                    | [6]                  |
| pET15iscS                                    | Ap <sup>r</sup> , T7 promotor, His-Tag, NdeI/BamHI fragment of amplified iscS                                                                                                                       | this work            |
| pBBRMCS2-L                                   | Kan <sup>r</sup> , dsr promotor, NdeI/BamHI fragment of amplified dsrL                                                                                                                              | [3]                  |
| pBBRMCS2dsrEFH                               | Kan <sup>r</sup> , dsr promotor, NdeI/BamHI fragment of amplified dsrEFH                                                                                                                            | [4]                  |
| pBBR1MCS2dsrE <sub>78</sub> FH               | Kan <sup>r</sup> , dsr promotor, NdeI/BamHI fragment of dsrE <sub>78</sub> FH                                                                                                                       | this work            |
| pBBR1MCS2dsrEFH <sub>20</sub>                | Kan <sup>r</sup> , dsr promotor, NdeI/BamHI fragment of dsrEFH <sub>20</sub>                                                                                                                        | this work            |
| pBBR1MCS2dsrE <sub>78</sub> FH <sub>20</sub> | Kan <sup>r</sup> , dsr promotor, NdeI/BamHI fragment of dsrE <sub>78</sub> FH <sub>20</sub>                                                                                                         | this work            |

## References

1. Hanahan D (1983) Studies on transformation of *Escherichia coli* with plasmids. J Mol Biol 166: 557-580.
2. Simon R, Priefer U, Pühler A (1983) A broad host range mobilization system for *in vivo* genetic engineering: transposon mutagenesis in gram negative bacteria. Bio/Technology 1: 784-791.
3. Lübke YJ, Youn H-S, Timkovich R, Dahl C (2006) Siro(haem)amide in *Allochromatium vinosum* and relevance of DsrL and DsrN, a homolog of cobyrinic acid *a,c* diamide synthase for sulphur oxidation. FEMS Microbiol Lett 261: 194-202.
4. Dahl C et al. (2008) Structural and molecular genetic insight into a wide-spread bacterial sulfur oxidation pathway. J Mol Biol 384: 1287-1300.
5. Dahl C, Schulte A, Shin DH (2007) Cloning, expression, purification, crystallization and preliminary X-ray diffraction analysis of DsrEFH from *Allochromatium vinosum*. Acta Cryst F63: 890-892.
6. Cort JR et al. (2008) *Allochromatium vinosum* DsrC: solution-state NMR structure, redox properties and interaction with DsrEFH, a protein essential for purple sulfur bacterial sulfur oxidation. J Mol Biol 382: 692-707.
